# Supplementary material for: Porcine Circovirus Type 2 Induces Single Immunoglobulin Interleukin-1 Related Receptor (SIGIRR) Downregulation to Promote Interleukin-1β Upregulation in Porcine Alveolar Macrophage
Source: PubMed Central journal article supplement (PMC6893714; doi:10.3390/v11111021), 2019-11-03
Supplement: viruses-11-01021-s001.pdf [file viruses-11-01021-s001.pdf]

**Table s1.** Differentially expressed (absolute fold change  $\geq 2$  and  $P < 0.05$ ) inflammatory cytokines and receptors in PCV2-infected PAMs.

| Gene Symbol | Description                                                             | 1 HPI<br>(Fold Change) | 24 HPI<br>(Fold Change) | 48 HPI<br>(Fold Change) | Refseq       |
|-------------|-------------------------------------------------------------------------|------------------------|-------------------------|-------------------------|--------------|
| BMP2        | Aminoacyl tRNA synthetase complex-interacting multifunctional protein 1 | 2.15                   | -2.27                   | -1.45                   | NM_001195399 |
| C5          | Complement component 5                                                  | -1.18                  | 2.08                    | 3.09                    | NM_001001646 |
| CCL1        | Chemokine (C-C motif) ligand 1                                          | 15.81                  | -4.32                   | -2.22                   | NM_001166491 |
| CCL17       | Chemokine ligand 17-like protein                                        | 1.29                   | 1.25                    | -5.63                   | NM_001256147 |
| CCL2        | Chemokine (C-C motif) ligand 2                                          | 9.55                   | 2.05                    | -3.65                   | NM_214214    |
| CCL20       | Chemokine (C-C motif) ligand 20                                         | 20.81                  | 10.12                   | 12.27                   | NM_001024589 |
| CCL21       | Chemokine (C-C motif) ligand 21                                         | 3.05                   | -4.79                   | -3.33                   | NM_001005151 |
| CCL22       | C-C motif chemokine 22-like                                             | -1.73                  | -1.22                   | -5.34                   | NM_001256776 |
| CCL3L1      | Chemokine (C-C motif) ligand 3-like 1                                   | 51.60                  | -1.48                   | -6.82                   | NM_001009579 |
| CCL4        | Chemokine (C-C motif) ligand 4                                          | 109.09                 | -1.06                   | -3.46                   | NM_213779    |
| CCL5        | Chemokine (C-C motif) ligand 5                                          | 3.63                   | -1.26                   | -1.19                   | NM_001129946 |
| CCL8        | Chemokine (C-C motif) ligand 8                                          | 24.18                  | 3.82                    | -2.85                   | NM_001164515 |
| CCR2        | Chemokine (C-C motif) receptor 2                                        | -4.27                  | -1.75                   | -1.42                   | NM_001001619 |
| CCR7        | Chemokine (C-C motif) receptor 7                                        | 3.00                   | -1.94                   | -2.32                   | NM_001001532 |
| CD70        | CD70 molecule                                                           | 9.84                   | -1.94                   | 1.08                    | NM_001044531 |
| CSF1        | Colony stimulating factor 1 (macrophage)                                | 2.19                   | -4.91                   | -19.38                  | NM_001244523 |
| CSF2        | Colony stimulating factor 2 (granulocyte-macrophage)                    | 203.09                 | 5.29                    | 4.99                    | NM_214118    |
| CSF3        | Colony stimulating factor 3 (granulocyte)                               | 13.89                  | 5.28                    | 9.22                    | NM_213842    |
| CXCL10      | Chemokine (C-X-C motif) ligand 10                                       | 1.36                   | -1.49                   | -28.25                  | NM_001008691 |
| CXCL2       | Chemokine (C-X-C motif) ligand 2                                        | 53.05                  | 13.85                   | 10.37                   | XM_005652553 |
| CXCR2       | Chemokine (C-X-C motif) receptor 2                                      | -1.26                  | 3.26                    | 4.83                    | XM_005672195 |
| CXCR4       | Chemokine (C-X-C motif) receptor 4                                      | 2.68                   | 3.70                    | 4.64                    | NM_213773    |
| IL10        | Interleukin 10                                                          | 6.82                   | 5.93                    | 5.98                    | NM_214041    |
| IL10RA      | Interleukin 10 receptor, alpha                                          | 1.95                   | 1.54                    | 3.74                    | XM_003129890 |
| IL12B       | Interleukin 12B (natural killer cell stimulatory factor 2, cytotoxic    | 1.29                   | 2.15                    | 3.07                    | NM_214013    |

| lymphocyte maturation factor 2, p40) |                                                                      |        |       |       |              |
|--------------------------------------|----------------------------------------------------------------------|--------|-------|-------|--------------|
| IL13                                 | Interleukin 13                                                       | 3.58   | 1.19  | 1.98  | NM_213803    |
| IL15                                 | Interleukin 15                                                       | -4.41  | -1.33 | -1.29 | NM_214390    |
| IL16                                 | Interleukin 16                                                       | -2.09  | 1.16  | 1.19  | NM_213751    |
| IL18                                 | Interleukin 18 (interferon-gamma-inducing factor)                    | 2.55   | 3.15  | 5.69  | NM_213997    |
| IL1A                                 | Interleukin 1, alpha                                                 | 197.54 | 10.07 | 6.99  | NM_214029    |
| IL1B                                 | Interleukin 1, beta                                                  | 367.77 | 10.19 | 7.81  | NM_214055    |
| IL1RN                                | Interleukin 1 receptor antagonist                                    | -1.28  | -1.85 | -3.62 | NM_214262    |
| IL23A                                | Interleukin 23, alpha subunit p19                                    | 52.69  | 6.52  | 4.38  | NM_001130236 |
| IL27                                 | Interleukin 27                                                       | 11.36  | 1.22  | 1.14  | NM_001007520 |
| IL-5                                 | Interleukin 5                                                        | 2.36   | 1.17  | 1.06  | NM_214205    |
| IL6                                  | Interleukin 6 (interferon, beta 2)                                   | 3.27   | 10.00 | 2.27  | NM_214399    |
| IL7                                  | Interleukin 7                                                        | 1.28   | 2.08  | 1.63  | NM_214135    |
| IL7R                                 | Interleukin 7 receptor                                               | 10.12  | 7.58  | 7.23  | NM_001146128 |
| IL8                                  | Interleukin 8                                                        | 27.59  | 5.39  | 2.42  | NM_213867    |
| LIF                                  | Leukemia inhibitory factor (cholinergic differentiation factor)      | 24.81  | -1.78 | 1.91  | NM_214402    |
| IL33                                 | Interleukin-33-like                                                  | 1.69   | 3.18  | 5.11  | XM_003121912 |
| LOC100519468                         | Tumor necrosis factor ligand superfamily member 14-like<br>(TNFSF14) | 1.36   | -2.10 | -3.57 | NM_001260482 |
| LTB                                  | Lymphotoxin beta (TNF superfamily, member 3)                         | 2.12   | -2.52 | 1.44  | NM_001185138 |
| NAMPT                                | Nicotinamide phosphoribosyltransferase                               | 2.03   | 1.13  | -1.08 | NM_001031793 |
| SPP1                                 | Secreted phosphoprotein 1                                            | -1.10  | -2.16 | -8.29 | NM_214023    |
| TNF                                  | Tumor necrosis factor                                                | 146.29 | 1.94  | 1.77  | NM_214022    |
| TNFRSF11B                            | Tumor necrosis factor receptor superfamily, member 11b               | -1.92  | -5.28 | -1.98 | XM_003481346 |
| TNFSF10                              | Tumor necrosis factor (ligand) superfamily, member 10                | -2.82  | 3.97  | 13.31 | NM_001024696 |
| TNFSF13B                             | Tumor necrosis factor (ligand) superfamily, member 13b               | 1.31   | 2.79  | 3.23  | NM_001097498 |

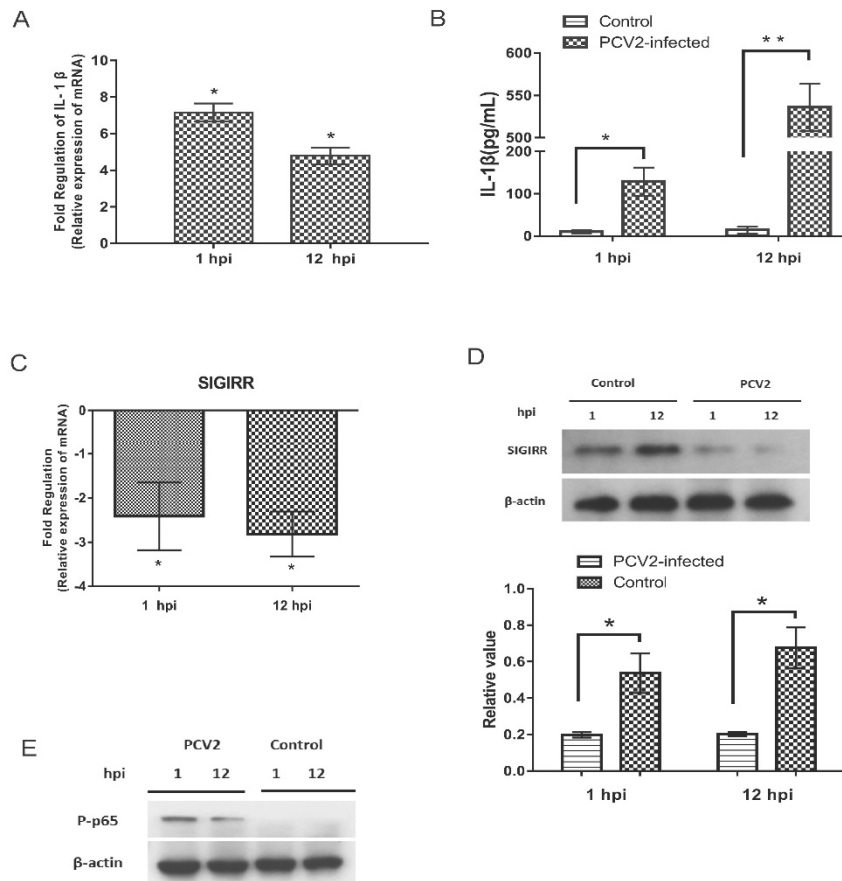

**Figure s1.** The expression of IL-1 $\beta$ , SIGIRR, and the activation of NF- $\kappa$ B in 3D4/2 post PCV2 infection. 3D4/2 cells were infected with PCV2b with MOI of 1 and 12h. (A) The IL-1 $\beta$  mRNA levels were detected by qPCR in 3D4/2 at 1 and 12 hpi. (B) The IL-1 $\beta$  secretion was measured in 3D4/2 at 1 and 12 hpi using a commercial porcine IL-1 $\beta$  ELISA kit. (C) The expression of SIGIRR in 3D4/2 at 1 and 12 hpi were examined by qPCR. The expression of SIGIRR mRNA was normalized to actin- $\beta$  and presented as fold change relative to the control. (D) The expression of SIGIRR in protein level was detected by Western blot. Densitometric analysis was performed to quantify the ratio of SIGIRR to actin- $\beta$ . Results are mean  $\pm$  SE of three independent experiments. Statistical differences in data were evaluated by Student's t-test. \* represent  $p < 0.05$ , \*\* represents  $p < 0.01$ . (E) The p-p65 was detected by Western blot in PCV2-infected 3D4/2 at 1 and 12 hpi.
